# Supplementary material
Source: publisher figshare collection journal article supplement (https://acs.figshare.com/ndownloader/files/4308430)
Supplement: Supplementary file 1 [file 4308430]

data_global 

 _publ_contact_author_name        'Bim Graham'
_publ_contact_author_address     
;Medicinal Chemistry and Drug Action
 Monash Institute of Pharmaceutical Sciences
Monash University
Parkville
Victoria, Australia, 3052
;
_publ_contact_author_email       bim.graham@monash.edu
_publ_contact_author_phone       +610399039706
_publ_contact_author_fax         +610399039582


loop_
_publ_author_name
_publ_author_address
'Spiccia, Leone'
;School of Chemistry
Wellington Rd
Clayton
Victoria, Australia, 3800
;
'Tjioe, Linda'
;Monash University
School of Chemistry
Wellington Rd
Clayton
Victoria, Australia, 3800
;
'Joshi, Tanmaya'
;Monash University
School of Chemistry
Wellington Rd
Clayton
Victoria, Australia, 3800
;
'Meininger, Anja'
;School of Chemistry
Ruprecht-Karls-Universit�t
Heidelberg
;
'Graham, Bim'
;Medicinal Chemistry and Drug Action
 Monash Institute of Pharmaceutical Sciences
Monash University
Parkville
Victoria, Australia, 3052
;

_publ_requested_journal      'Inorg. Chem.' 

_publ_section_title                              
;
Efficient plasmid DNA cleavage by copper(II) complexes of 1,4,7-triazacyclononane ligands featuring xylyl-linked guanidinium groups
;
data_cutoxyg
 
_audit_creation_method            SHELXL-97 
_chemical_name_systematic 
; 
 ? 
; 
_chemical_name_common             '(1-[4-(1,4,7-triazacyclonon-1-yl)-ortho-xylyl]guanidine)copper(II) perchlorate' 
_chemical_melting_point           ? 
_chemical_formula_moiety          'C15 H27 Cl2 Cu N6, C3 H7 N O, Cl' 
_chemical_formula_sum 
 'C18 H34 Cl3 Cu N7 O' 
_chemical_formula_weight          534.41 
 
loop_ 
 _atom_type_symbol 
 _atom_type_description 
 _atom_type_scat_dispersion_real 
 _atom_type_scat_dispersion_imag 
 _atom_type_scat_source 
 'C'  'C'   0.0033   0.0016 
 'International Tables Vol C Tables 4.2.6.8 and 6.1.1.4' 
 'H'  'H'   0.0000   0.0000 
 'International Tables Vol C Tables 4.2.6.8 and 6.1.1.4' 
 'N'  'N'   0.0061   0.0033 
 'International Tables Vol C Tables 4.2.6.8 and 6.1.1.4' 
 'O'  'O'   0.0106   0.0060 
 'International Tables Vol C Tables 4.2.6.8 and 6.1.1.4' 
 'Cl'  'Cl'   0.1484   0.1585 
 'International Tables Vol C Tables 4.2.6.8 and 6.1.1.4' 
 'Cu'  'Cu'   0.3201   1.2651 
 'International Tables Vol C Tables 4.2.6.8 and 6.1.1.4' 
 
_symmetry_cell_setting            monoclinic 
_symmetry_space_group_name_H-M    'P21/c'
_symmetry_space_group_name_Hall   '-P 2ybc'
loop_ 
 _symmetry_equiv_pos_as_xyz 
 'x, y, z' 
 '-x, y+1/2, -z+1/2' 
 '-x, -y, -z' 
 'x, -y-1/2, z-1/2' 
 
_cell_length_a                    17.9182(5) 
_cell_length_b                    9.5518(3) 
_cell_length_c                    14.7300(4) 
_cell_angle_alpha                 90.00 
_cell_angle_beta                  107.3150(10) 
_cell_angle_gamma                 90.00 
_cell_volume                      2406.81(12) 
_cell_formula_units_Z             4 
_cell_measurement_temperature     123(2) 
_cell_measurement_reflns_used     ? 
_cell_measurement_theta_min       ? 
_cell_measurement_theta_max       ? 
 
_exptl_crystal_description        block 
_exptl_crystal_colour             blue
_exptl_crystal_size_max           0.20 
_exptl_crystal_size_mid           0.20 
_exptl_crystal_size_min           0.05 
_exptl_crystal_density_meas       ? 
_exptl_crystal_density_diffrn     1.475 
_exptl_crystal_density_method     'not measured' 
_exptl_crystal_F_000              1116 
_exptl_absorpt_coefficient_mu     1.265 
_exptl_absorpt_correction_type    'multi-scan'
_exptl_absorpt_correction_T_min   0.7860 
_exptl_absorpt_correction_T_max   0.9394 
_exptl_absorpt_process_details    SADABS 
 
_exptl_special_details 
; 
 ? 
; 
 
_diffrn_ambient_temperature       123(2) 
_diffrn_radiation_wavelength      0.71073 
_diffrn_radiation_type            MoK\a 
_diffrn_radiation_source          'fine-focus sealed tube' 
_diffrn_radiation_monochromator   graphite 
_diffrn_measurement_device_type   'Bruker X8 Apex CCD' 
_diffrn_measurement_method        'phi and omega scans' 
_diffrn_detector_area_resol_mean  ? 
_diffrn_standards_number          ? 
_diffrn_standards_interval_count  ? 
_diffrn_standards_interval_time   ? 
_diffrn_standards_decay_%         ? 
_diffrn_reflns_number             17289 
_diffrn_reflns_av_R_equivalents   0.0500 
_diffrn_reflns_av_sigmaI/netI     0.0663 
_diffrn_reflns_limit_h_min        -23 
_diffrn_reflns_limit_h_max        23 
_diffrn_reflns_limit_k_min        -12 
_diffrn_reflns_limit_k_max        11 
_diffrn_reflns_limit_l_min        -13 
_diffrn_reflns_limit_l_max        19 
_diffrn_reflns_theta_min          2.58 
_diffrn_reflns_theta_max          27.50 
_reflns_number_total              5519 
_reflns_number_gt                 4525 
_reflns_threshold_expression      >2sigma(I) 
 
_computing_data_collection        'Bruker Apex2 v2.0' 
_computing_cell_refinement        'Bruker Apex2 v2.0' 
_computing_data_reduction         'Bruker Apex2 v2.0' 
_computing_structure_solution     'SHELXS-97 (Sheldrick, 1990)' 
_computing_structure_refinement   'SHELXL-97 (Sheldrick, 1997)' 
_computing_molecular_graphics     'X-Seed' 
_computing_publication_material   'CIFTAB' 
 
_refine_special_details 
; 
 Refinement of F^2^ against ALL reflections.  The weighted R-factor wR and 
 goodness of fit S are based on F^2^, conventional R-factors R are based 
 on F, with F set to zero for negative F^2^. The threshold expression of 
 F^2^ > 2sigma(F^2^) is used only for calculating R-factors(gt) etc. and is 
 not relevant to the choice of reflections for refinement.  R-factors based 
 on F^2^ are statistically about twice as large as those based on F, and R- 
 factors based on ALL data will be even larger. All hydrogen atoms were placed in idealized positions, except for the hydrogens on  the nitrogen atoms, which were located on the Fourier difference map.The isotropic thermal  parameters for N-H hydrogen atoms were fixed at 1.2 times that of the respective  nitrogen atom. 
; 
 
_refine_ls_structure_factor_coef  Fsqd  
_refine_ls_matrix_type            full 
_refine_ls_weighting_scheme       calc  
_refine_ls_weighting_details 
 'calc w=1/[\s^2^(Fo^2^)+(0.0073P)^2^+2.5842P] where P=(Fo^2^+2Fc^2^)/3' 
_atom_sites_solution_primary      direct 
_atom_sites_solution_secondary    difmap 
_atom_sites_solution_hydrogens    geom 
_refine_ls_hydrogen_treatment     mixed 
_refine_ls_extinction_method      none 
_refine_ls_extinction_coef        ? 
_refine_ls_number_reflns          5519 
_refine_ls_number_parameters      294 
_refine_ls_number_restraints      0 
_refine_ls_R_factor_all           0.0646 
_refine_ls_R_factor_gt            0.0489 
_refine_ls_wR_factor_ref          0.0878 
_refine_ls_wR_factor_gt           0.0815 
_refine_ls_goodness_of_fit_ref    1.109 
_refine_ls_restrained_S_all       1.109 
_refine_ls_shift/su_max           0.001 
_refine_ls_shift/su_mean          0.000 
 
loop_ 
 _atom_site_label 
 _atom_site_type_symbol 
 _atom_site_fract_x 
 _atom_site_fract_y 
 _atom_site_fract_z 
 _atom_site_U_iso_or_equiv 
 _atom_site_adp_type 
 _atom_site_occupancy 
 _atom_site_symmetry_multiplicity 
 _atom_site_calc_flag 
 _atom_site_refinement_flags 
 _atom_site_disorder_assembly 
 _atom_site_disorder_group 
Cu1 Cu 0.42855(2) 0.22218(4) 0.22738(2) 0.01567(10) Uani 1 1 d . . . 
Cl1 Cl 0.36823(4) 0.08311(9) 0.09969(5) 0.02397(18) Uani 1 1 d . . . 
O1 O 0.19256(14) 0.9858(2) 0.40644(16) 0.0327(6) Uani 1 1 d . . . 
N1 N 0.48704(15) 0.3134(3) 0.35310(17) 0.0181(6) Uani 1 1 d . . . 
C1 C 0.49786(18) 0.1988(3) 0.42325(19) 0.0217(7) Uani 1 1 d . . . 
H1A H 0.5199 0.2364 0.4884 0.026 Uiso 1 1 calc R . . 
H1B H 0.5348 0.1287 0.4121 0.026 Uiso 1 1 calc R . . 
Cl2 Cl 0.51347(5) 0.32622(8) 0.16147(5) 0.02485(18) Uani 1 1 d . . . 
N2 N 0.37722(15) 0.1107(3) 0.31054(17) 0.0171(5) Uani 1 1 d . . . 
C2 C 0.41957(18) 0.1307(3) 0.41335(19) 0.0204(7) Uani 1 1 d . . . 
H2A H 0.4275 0.0390 0.4462 0.025 Uiso 1 1 calc R . . 
H2B H 0.3883 0.1906 0.4431 0.025 Uiso 1 1 calc R . . 
Cl3 Cl 0.02855(5) 0.41608(9) -0.31380(5) 0.0305(2) Uani 1 1 d . . . 
N3 N 0.33594(14) 0.3816(2) 0.23342(15) 0.0153(5) Uani 1 1 d . . . 
C3 C 0.29431(17) 0.1542(3) 0.2824(2) 0.0199(7) Uani 1 1 d . . . 
H3A H 0.2679 0.1108 0.3256 0.024 Uiso 1 1 calc R . . 
H3B H 0.2678 0.1215 0.2170 0.024 Uiso 1 1 calc R . . 
N4 N 0.11450(16) 0.3280(3) -0.01418(18) 0.0216(6) Uani 1 1 d . . . 
C4 C 0.28814(17) 0.3125(3) 0.2868(2) 0.0171(6) Uani 1 1 d . . . 
H4A H 0.2328 0.3409 0.2597 0.021 Uiso 1 1 calc R . . 
H4B H 0.3060 0.3434 0.3540 0.021 Uiso 1 1 calc R . . 
N5 N 0.08752(18) 0.1893(3) -0.14822(18) 0.0247(6) Uani 1 1 d . . . 
C5 C 0.38593(17) 0.4931(3) 0.28764(19) 0.0180(6) Uani 1 1 d . . . 
H5A H 0.3529 0.5637 0.3066 0.022 Uiso 1 1 calc R . . 
H5B H 0.4131 0.5401 0.2466 0.022 Uiso 1 1 calc R . . 
N6 N 0.07381(17) 0.1003(3) -0.00949(19) 0.0226(6) Uani 1 1 d . . . 
C6 C 0.44594(18) 0.4376(3) 0.37569(19) 0.0199(7) Uani 1 1 d . . . 
H6A H 0.4845 0.5119 0.4033 0.024 Uiso 1 1 calc R . . 
H6B H 0.4197 0.4116 0.4237 0.024 Uiso 1 1 calc R . . 
N7 N 0.22045(15) 0.7554(3) 0.40199(18) 0.0228(6) Uani 1 1 d . . . 
C7 C 0.29048(17) 0.4248(3) 0.13563(19) 0.0174(6) Uani 1 1 d . . . 
H7A H 0.2647 0.3411 0.1003 0.021 Uiso 1 1 calc R . . 
H7B H 0.3272 0.4613 0.1028 0.021 Uiso 1 1 calc R . . 
C8 C 0.22851(18) 0.5355(3) 0.13143(19) 0.0185(6) Uani 1 1 d . . . 
C9 C 0.2511(2) 0.6744(3) 0.1475(2) 0.0248(7) Uani 1 1 d . . . 
H9 H 0.3044 0.6988 0.1578 0.030 Uiso 1 1 calc R . . 
C10 C 0.1975(2) 0.7783(3) 0.1488(2) 0.0300(8) Uani 1 1 d . . . 
H10 H 0.2141 0.8728 0.1603 0.036 Uiso 1 1 calc R . . 
C11 C 0.1200(2) 0.7440(4) 0.1336(2) 0.0343(9) Uani 1 1 d . . . 
H11 H 0.0832 0.8143 0.1359 0.041 Uiso 1 1 calc R . . 
C12 C 0.0963(2) 0.6064(4) 0.1148(2) 0.0300(8) Uani 1 1 d . . . 
H12 H 0.0427 0.5831 0.1033 0.036 Uiso 1 1 calc R . . 
C13 C 0.14952(18) 0.5015(3) 0.1123(2) 0.0215(7) Uani 1 1 d . . . 
C14 C 0.11860(18) 0.3556(3) 0.0846(2) 0.0226(7) Uani 1 1 d . . . 
H14A H 0.1534 0.2862 0.1265 0.027 Uiso 1 1 calc R . . 
H14B H 0.0659 0.3463 0.0926 0.027 Uiso 1 1 calc R . . 
C15 C 0.09118(17) 0.2068(3) -0.0567(2) 0.0195(6) Uani 1 1 d . . . 
C16 C 0.1715(2) 0.8627(4) 0.3909(2) 0.0268(8) Uani 1 1 d . . . 
H16 H 0.1170 0.8436 0.3696 0.032 Uiso 1 1 calc R . . 
C17 C 0.1932(2) 0.6128(4) 0.3800(3) 0.0338(8) Uani 1 1 d . . . 
H17A H 0.1359 0.6112 0.3610 0.051 Uiso 1 1 calc R . . 
H17B H 0.2140 0.5538 0.4362 0.051 Uiso 1 1 calc R . . 
H17C H 0.2112 0.5773 0.3277 0.051 Uiso 1 1 calc R . . 
C18 C 0.30404(19) 0.7773(4) 0.4333(2) 0.0326(8) Uani 1 1 d . . . 
H18A H 0.3240 0.7761 0.3781 0.049 Uiso 1 1 calc R . . 
H18B H 0.3291 0.7026 0.4774 0.049 Uiso 1 1 calc R . . 
H18C H 0.3157 0.8680 0.4654 0.049 Uiso 1 1 calc R . . 
H5BN H 0.081(2) 0.257(4) -0.179(2) 0.039 Uiso 1 1 d . . . 
H2N H 0.381(2) 0.024(4) 0.295(2) 0.039 Uiso 1 1 d . . . 
H6AN H 0.053(2) 0.026(4) -0.042(2) 0.039 Uiso 1 1 d . . . 
H5AN H 0.062(2) 0.117(4) -0.177(2) 0.039 Uiso 1 1 d . . . 
H6BN H 0.072(2) 0.106(4) 0.045(3) 0.039 Uiso 1 1 d . . . 
H1N H 0.527(2) 0.337(4) 0.348(3) 0.039 Uiso 1 1 d . . . 
H4N H 0.130(2) 0.379(4) -0.042(2) 0.039 Uiso 1 1 d . . . 
 
loop_ 
 _atom_site_aniso_label 
 _atom_site_aniso_U_11 
 _atom_site_aniso_U_22 
 _atom_site_aniso_U_33 
 _atom_site_aniso_U_23 
 _atom_site_aniso_U_13 
 _atom_site_aniso_U_12 
Cu1 0.01715(19) 0.0176(2) 0.01260(17) -0.00031(14) 0.00498(14) 0.00130(15) 
Cl1 0.0225(4) 0.0290(4) 0.0194(3) -0.0073(3) 0.0049(3) -0.0002(3) 
O1 0.0457(16) 0.0225(13) 0.0359(13) 0.0019(11) 0.0213(12) 0.0038(11) 
N1 0.0176(13) 0.0226(15) 0.0144(11) 0.0024(11) 0.0054(11) -0.0012(11) 
C1 0.0253(17) 0.0252(18) 0.0130(13) 0.0021(13) 0.0031(13) 0.0020(14) 
Cl2 0.0326(4) 0.0260(4) 0.0201(3) -0.0031(3) 0.0141(3) -0.0072(3) 
N2 0.0190(13) 0.0156(13) 0.0162(12) -0.0002(11) 0.0043(10) 0.0009(11) 
C2 0.0264(17) 0.0216(17) 0.0134(13) 0.0046(12) 0.0061(13) 0.0025(14) 
Cl3 0.0408(5) 0.0270(5) 0.0249(4) 0.0089(3) 0.0120(4) 0.0106(4) 
N3 0.0185(13) 0.0131(13) 0.0142(11) 0.0009(10) 0.0049(10) -0.0019(10) 
C3 0.0198(16) 0.0199(16) 0.0218(15) 0.0029(13) 0.0090(13) -0.0011(13) 
N4 0.0239(15) 0.0190(15) 0.0213(13) 0.0018(11) 0.0057(11) -0.0045(12) 
C4 0.0148(15) 0.0213(16) 0.0164(13) 0.0019(12) 0.0065(12) -0.0005(12) 
N5 0.0373(17) 0.0184(15) 0.0178(13) 0.0011(11) 0.0073(13) -0.0014(13) 
C5 0.0175(15) 0.0178(16) 0.0194(14) -0.0029(12) 0.0063(12) -0.0029(13) 
N6 0.0327(16) 0.0171(14) 0.0182(13) -0.0030(12) 0.0080(12) -0.0060(12) 
C6 0.0228(16) 0.0207(17) 0.0165(14) -0.0036(13) 0.0067(13) -0.0026(13) 
N7 0.0253(15) 0.0190(14) 0.0261(13) -0.0038(11) 0.0105(12) -0.0025(11) 
C7 0.0199(16) 0.0176(16) 0.0141(13) -0.0008(12) 0.0042(12) -0.0001(13) 
C8 0.0229(17) 0.0159(16) 0.0152(14) 0.0014(12) 0.0033(12) 0.0023(13) 
C9 0.0275(18) 0.0204(17) 0.0228(15) -0.0017(14) 0.0020(14) -0.0032(14) 
C10 0.037(2) 0.0141(17) 0.0329(18) -0.0018(14) 0.0013(16) 0.0023(15) 
C11 0.030(2) 0.027(2) 0.041(2) -0.0041(16) 0.0025(17) 0.0140(16) 
C12 0.0225(18) 0.030(2) 0.0329(18) -0.0031(16) 0.0015(15) 0.0034(15) 
C13 0.0228(17) 0.0178(16) 0.0217(15) -0.0023(13) 0.0031(13) 0.0006(13) 
C14 0.0206(17) 0.0251(18) 0.0220(15) -0.0003(14) 0.0064(13) -0.0017(14) 
C15 0.0168(15) 0.0172(16) 0.0229(15) 0.0020(13) 0.0034(13) 0.0033(13) 
C16 0.0275(18) 0.032(2) 0.0230(16) 0.0014(15) 0.0109(14) 0.0033(16) 
C17 0.032(2) 0.0227(19) 0.047(2) -0.0080(16) 0.0127(17) -0.0042(15) 
C18 0.0255(19) 0.029(2) 0.043(2) -0.0068(17) 0.0099(16) -0.0028(16) 
 
_geom_special_details 
; 
 All esds (except the esd in the dihedral angle between two l.s. planes) 
 are estimated using the full covariance matrix.  The cell esds are taken 
 into account individually in the estimation of esds in distances, angles 
 and torsion angles; correlations between esds in cell parameters are only 
 used when they are defined by crystal symmetry.  An approximate (isotropic) 
 treatment of cell esds is used for estimating esds involving l.s. planes. 
; 
 
loop_ 
 _geom_bond_atom_site_label_1 
 _geom_bond_atom_site_label_2 
 _geom_bond_distance 
 _geom_bond_site_symmetry_2 
 _geom_bond_publ_flag 
Cu1 N1 2.033(2) . ? 
Cu1 N2 2.037(2) . ? 
Cu1 Cl2 2.2637(8) . ? 
Cu1 N3 2.273(2) . ? 
Cu1 Cl1 2.2936(8) . ? 
O1 C16 1.236(4) . ? 
N1 C1 1.478(4) . ? 
N1 C6 1.485(4) . ? 
C1 C2 1.514(4) . ? 
N2 C3 1.478(4) . ? 
N2 C2 1.491(3) . ? 
N3 C5 1.466(4) . ? 
N3 C4 1.479(3) . ? 
N3 C7 1.487(3) . ? 
C3 C4 1.519(4) . ? 
N4 C15 1.323(4) . ? 
N4 C14 1.458(4) . ? 
N5 C15 1.341(4) . ? 
C5 C6 1.513(4) . ? 
N6 C15 1.320(4) . ? 
N7 C16 1.327(4) . ? 
N7 C18 1.445(4) . ? 
N7 C17 1.450(4) . ? 
C7 C8 1.521(4) . ? 
C8 C9 1.387(4) . ? 
C8 C13 1.397(4) . ? 
C9 C10 1.385(4) . ? 
C10 C11 1.378(5) . ? 
C11 C12 1.384(5) . ? 
C12 C13 1.391(4) . ? 
C13 C14 1.511(4) . ? 
 
loop_ 
 _geom_angle_atom_site_label_1 
 _geom_angle_atom_site_label_2 
 _geom_angle_atom_site_label_3 
 _geom_angle 
 _geom_angle_site_symmetry_1 
 _geom_angle_site_symmetry_3 
 _geom_angle_publ_flag 
N1 Cu1 N2 83.05(10) . . ? 
N1 Cu1 Cl2 88.42(7) . . ? 
N2 Cu1 Cl2 165.61(7) . . ? 
N1 Cu1 N3 82.04(9) . . ? 
N2 Cu1 N3 82.02(9) . . ? 
Cl2 Cu1 N3 108.33(6) . . ? 
N1 Cu1 Cl1 169.99(8) . . ? 
N2 Cu1 Cl1 90.20(7) . . ? 
Cl2 Cu1 Cl1 96.63(3) . . ? 
N3 Cu1 Cl1 104.40(6) . . ? 
C1 N1 C6 113.9(2) . . ? 
C1 N1 Cu1 104.12(18) . . ? 
C6 N1 Cu1 113.02(18) . . ? 
N1 C1 C2 109.0(2) . . ? 
C3 N2 C2 114.4(2) . . ? 
C3 N2 Cu1 106.30(18) . . ? 
C2 N2 Cu1 111.07(18) . . ? 
N2 C2 C1 109.3(2) . . ? 
C5 N3 C4 113.0(2) . . ? 
C5 N3 C7 113.3(2) . . ? 
C4 N3 C7 113.7(2) . . ? 
C5 N3 Cu1 99.98(17) . . ? 
C4 N3 Cu1 105.50(17) . . ? 
C7 N3 Cu1 110.13(16) . . ? 
N2 C3 C4 110.4(2) . . ? 
C15 N4 C14 123.0(3) . . ? 
N3 C4 C3 111.1(2) . . ? 
N3 C5 C6 112.1(2) . . ? 
N1 C6 C5 111.2(2) . . ? 
C16 N7 C18 120.8(3) . . ? 
C16 N7 C17 122.1(3) . . ? 
C18 N7 C17 117.1(3) . . ? 
N3 C7 C8 114.6(2) . . ? 
C9 C8 C13 118.9(3) . . ? 
C9 C8 C7 119.0(3) . . ? 
C13 C8 C7 122.0(3) . . ? 
C10 C9 C8 121.3(3) . . ? 
C11 C10 C9 119.8(3) . . ? 
C10 C11 C12 119.5(3) . . ? 
C11 C12 C13 121.1(3) . . ? 
C12 C13 C8 119.3(3) . . ? 
C12 C13 C14 118.2(3) . . ? 
C8 C13 C14 122.5(3) . . ? 
N4 C14 C13 110.0(3) . . ? 
N6 C15 N4 121.0(3) . . ? 
N6 C15 N5 119.0(3) . . ? 
N4 C15 N5 119.9(3) . . ? 
O1 C16 N7 124.0(3) . . ? 
 
loop_ 
 _geom_hbond_atom_site_label_D 
 _geom_hbond_atom_site_label_H 
 _geom_hbond_atom_site_label_A 
 _geom_hbond_distance_DH 
 _geom_hbond_distance_HA 
 _geom_hbond_distance_DA 
 _geom_hbond_angle_DHA 
 _geom_hbond_site_symmetry_A 
N2 H2N Cl2  0.86(4) 2.62(4) 3.303(3) 137(3) 2_645 
N4 H4N O1  0.74(4) 2.00(4) 2.731(3) 168(4) 4_575 
N6 H6AN Cl3  0.87(4) 2.43(4) 3.224(3) 151(3) 2_544 
N6 H6BN Cl3  0.82(4) 2.44(4) 3.222(3) 162(3) 4_566 
N5 H5BN Cl3  0.78(4) 2.46(4) 3.197(3) 160(4) . 
N5 H5AN Cl3  0.87(4) 2.48(4) 3.280(3) 152(3) 2_544 
 
_diffrn_measured_fraction_theta_max    0.998 
_diffrn_reflns_theta_full              27.50 
_diffrn_measured_fraction_theta_full   0.998 
_refine_diff_density_max    0.454 
_refine_diff_density_min   -0.550 
_refine_diff_density_rms    0.087 
#===END 
data_lt1 
 
_audit_creation_method            SHELXL-97 
_chemical_name_systematic 
; 
 ? 
; 
_chemical_name_common             '(1-[4-(1,4,7-triazacyclonon-1-yl)-para-xylyl]guanidine)copper(II) perchlorate'
_chemical_melting_point           ? 
_chemical_formula_moiety          'C15 H27 Cl2 Cu N6, 2(C H4 O), Cl'
_chemical_formula_sum 
 'C17 H35 Cl3 Cu N6 O2' 
_chemical_formula_weight          525.40 
 
loop_ 
 _atom_type_symbol 
 _atom_type_description 
 _atom_type_scat_dispersion_real 
 _atom_type_scat_dispersion_imag 
 _atom_type_scat_source 
 'C'  'C'   0.0033   0.0016 
 'International Tables Vol C Tables 4.2.6.8 and 6.1.1.4' 
 'H'  'H'   0.0000   0.0000 
 'International Tables Vol C Tables 4.2.6.8 and 6.1.1.4' 
 'N'  'N'   0.0061   0.0033 
 'International Tables Vol C Tables 4.2.6.8 and 6.1.1.4' 
 'O'  'O'   0.0106   0.0060 
 'International Tables Vol C Tables 4.2.6.8 and 6.1.1.4' 
 'Cl'  'Cl'   0.1484   0.1585 
 'International Tables Vol C Tables 4.2.6.8 and 6.1.1.4' 
 'Cu'  'Cu'   0.3201   1.2651 
 'International Tables Vol C Tables 4.2.6.8 and 6.1.1.4' 
 
_symmetry_cell_setting            monoclinic 
_symmetry_space_group_name_H-M    'P21/c' 
_symmetry_space_group_name_Hall   '-P 2ybc' 
loop_ 
 _symmetry_equiv_pos_as_xyz 
 'x, y, z' 
 '-x, y+1/2, -z+1/2' 
 '-x, -y, -z' 
 'x, -y-1/2, z-1/2' 
 
_cell_length_a                    11.8641(5) 
_cell_length_b                    7.3579(4) 
_cell_length_c                    28.2754(12) 
_cell_angle_alpha                 90.00 
_cell_angle_beta                  101.193(2) 
_cell_angle_gamma                 90.00 
_cell_volume                      2421.3(2) 
_cell_formula_units_Z             4 
_cell_measurement_temperature     123(2) 
_cell_measurement_reflns_used     ? 
_cell_measurement_theta_min       ? 
_cell_measurement_theta_max       ? 
 
_exptl_crystal_description        cuboid 
_exptl_crystal_colour             blue 
_exptl_crystal_size_max           0.35 
_exptl_crystal_size_mid           0.25 
_exptl_crystal_size_min           0.10 
_exptl_crystal_density_meas       ? 
_exptl_crystal_density_diffrn     1.441 
_exptl_crystal_density_method     'not measured' 
_exptl_crystal_F_000              1100 
_exptl_absorpt_coefficient_mu     1.258 
_exptl_absorpt_correction_type    'multi-scan'
_exptl_absorpt_correction_T_min   0.6672 
_exptl_absorpt_correction_T_max   0.8845 
_exptl_absorpt_process_details    SADABS 
 
_exptl_special_details 
; 
 ? 
; 
 
_diffrn_ambient_temperature       123(2) 
_diffrn_radiation_wavelength      0.71073 
_diffrn_radiation_type            MoK\a 
_diffrn_radiation_source          'fine-focus sealed tube' 
_diffrn_radiation_monochromator   graphite 
_diffrn_measurement_device_type   'Bruker X8 Apex CCD' 
_diffrn_measurement_method        'phi and omega scans'  
_diffrn_detector_area_resol_mean  ? 
_diffrn_standards_number          ? 
_diffrn_standards_interval_count  ? 
_diffrn_standards_interval_time   ? 
_diffrn_standards_decay_%         ? 
_diffrn_reflns_number             22848 
_diffrn_reflns_av_R_equivalents   0.0243 
_diffrn_reflns_av_sigmaI/netI     0.0284 
_diffrn_reflns_limit_h_min        -16 
_diffrn_reflns_limit_h_max        14 
_diffrn_reflns_limit_k_min        -5 
_diffrn_reflns_limit_k_max        10 
_diffrn_reflns_limit_l_min        -39 
_diffrn_reflns_limit_l_max        39 
_diffrn_reflns_theta_min          3.11 
_diffrn_reflns_theta_max          30.00 
_reflns_number_total              7051 
_reflns_number_gt                 6065 
_reflns_threshold_expression      >2sigma(I) 
 
_computing_data_collection        'Bruker Apex2 v2.0'  
_computing_cell_refinement        'Bruker Apex2 v2.0'  
_computing_data_reduction         'Bruker Apex2 v2.0'  
_computing_structure_solution     'SHELXS-97 (Sheldrick, 1990)' 
_computing_structure_refinement   'SHELXL-97 (Sheldrick, 1997)' 
_computing_molecular_graphics     'X-Seed' 
_computing_publication_material   'CIFTAB' 
 
_refine_special_details 
; 
 Refinement of F^2^ against ALL reflections.  The weighted R-factor wR and 
 goodness of fit S are based on F^2^, conventional R-factors R are based 
 on F, with F set to zero for negative F^2^. The threshold expression of 
 F^2^ > 2sigma(F^2^) is used only for calculating R-factors(gt) etc. and is 
 not relevant to the choice of reflections for refinement.  R-factors based 
 on F^2^ are statistically about twice as large as those based on F, and R- 
 factors based on ALL data will be even larger. All hydrogen atoms were placed in idealized positions, except for the hydrogens on  the nitrogen atoms, which were located on the Fourier difference map.The isotropic thermal  parameters for N-H hydrogen atoms were fixed at 1.2 times that of the respective  nitrogen atom. 
; 
 
_refine_ls_structure_factor_coef  Fsqd  
_refine_ls_matrix_type            full 
_refine_ls_weighting_scheme       calc  
_refine_ls_weighting_details 
 'calc w=1/[\s^2^(Fo^2^)+(0.0308P)^2^+1.0282P] where P=(Fo^2^+2Fc^2^)/3' 
_atom_sites_solution_primary      direct 
_atom_sites_solution_secondary    difmap 
_atom_sites_solution_hydrogens    geom 
_refine_ls_hydrogen_treatment     mixed 
_refine_ls_extinction_method      none 
_refine_ls_extinction_coef        ? 
_refine_ls_number_reflns          7051 
_refine_ls_number_parameters      297 
_refine_ls_number_restraints      3 
_refine_ls_R_factor_all           0.0341 
_refine_ls_R_factor_gt            0.0267 
_refine_ls_wR_factor_ref          0.0692 
_refine_ls_wR_factor_gt           0.0660 
_refine_ls_goodness_of_fit_ref    1.039 
_refine_ls_restrained_S_all       1.040 
_refine_ls_shift/su_max           0.004 
_refine_ls_shift/su_mean          0.000 
 
loop_ 
 _atom_site_label 
 _atom_site_type_symbol 
 _atom_site_fract_x 
 _atom_site_fract_y 
 _atom_site_fract_z 
 _atom_site_U_iso_or_equiv 
 _atom_site_adp_type 
 _atom_site_occupancy 
 _atom_site_symmetry_multiplicity 
 _atom_site_calc_flag 
 _atom_site_refinement_flags 
 _atom_site_disorder_assembly 
 _atom_site_disorder_group 
Cu1 Cu 0.065326(13) 0.13495(2) 0.054235(6) 0.01284(5) Uani 1 1 d . . . 
Cl1 Cl -0.10379(3) 0.30097(5) 0.036056(11) 0.01617(7) Uani 1 1 d . . . 
O1 O 0.47314(12) 1.2968(2) 0.46017(5) 0.0440(3) Uani 1 1 d D . . 
H1O H 0.4841 1.2313 0.4371 0.053 Uiso 1 1 calc RD . . 
N1 N 0.15649(10) 0.35222(16) 0.04020(4) 0.0150(2) Uani 1 1 d . . . 
C1 C 0.21423(12) 0.3707(2) 0.12887(5) 0.0181(3) Uani 1 1 d . . . 
H1A H 0.2958 0.3392 0.1299 0.022 Uiso 1 1 calc R . . 
H1B H 0.2104 0.4493 0.1569 0.022 Uiso 1 1 calc R . . 
H1 H 0.1185(16) 0.407(3) 0.0168(7) 0.023(5) Uiso 1 1 d . . . 
Cl2 Cl -0.02531(3) -0.12502(5) 0.069216(13) 0.01849(7) Uani 1 1 d . . . 
O2 O 0.48238(10) 0.39728(17) 0.30262(4) 0.0286(3) Uani 1 1 d D . . 
N2 N 0.21595(10) 0.00151(17) 0.05584(4) 0.0159(2) Uani 1 1 d . . . 
C2 C 0.16771(12) 0.47400(19) 0.08257(5) 0.0186(3) Uani 1 1 d . . . 
H2A H 0.0917 0.5261 0.0843 0.022 Uiso 1 1 calc R . . 
H2B H 0.2202 0.5755 0.0790 0.022 Uiso 1 1 calc R . . 
H2 H 0.1973(14) -0.103(2) 0.0459(6) 0.014(4) Uiso 1 1 d . . . 
Cl3 Cl 0.51265(3) 1.06384(5) 0.371746(13) 0.02423(8) Uani 1 1 d . . . 
N3 N 0.14790(10) 0.20295(17) 0.13201(4) 0.0159(2) Uani 1 1 d . . . 
C3 C 0.26951(12) 0.2989(2) 0.02862(5) 0.0186(3) Uani 1 1 d . . . 
H3A H 0.3322 0.3349 0.0555 0.022 Uiso 1 1 calc R . . 
H3B H 0.2810 0.3633 -0.0008 0.022 Uiso 1 1 calc R . . 
N4 N 0.23785(11) 0.55219(19) 0.38227(4) 0.0202(3) Uani 1 1 d D . . 
C4 C 0.27391(12) 0.0952(2) 0.02072(5) 0.0191(3) Uani 1 1 d . . . 
H4A H 0.2350 0.0648 -0.0126 0.023 Uiso 1 1 calc R . . 
H4B H 0.3548 0.0546 0.0251 0.023 Uiso 1 1 calc R . . 
N5 N 0.39119(12) 0.6729(2) 0.35286(5) 0.0246(3) Uani 1 1 d . . . 
C5 C 0.28725(12) -0.0062(2) 0.10527(5) 0.0196(3) Uani 1 1 d . . . 
H5A H 0.3521 0.0799 0.1074 0.024 Uiso 1 1 calc R . . 
H5B H 0.3198 -0.1299 0.1112 0.024 Uiso 1 1 calc R . . 
N6 N 0.28811(13) 0.8525(2) 0.39520(5) 0.0246(3) Uani 1 1 d . . . 
C6 C 0.21984(12) 0.0401(2) 0.14441(5) 0.0195(3) Uani 1 1 d . . . 
H6A H 0.1703 -0.0642 0.1490 0.023 Uiso 1 1 calc R . . 
H6B H 0.2742 0.0611 0.1752 0.023 Uiso 1 1 calc R . . 
C7 C 0.05935(12) 0.2244(2) 0.16204(5) 0.0201(3) Uani 1 1 d . . . 
H7A H 0.0131 0.1116 0.1596 0.024 Uiso 1 1 calc R . . 
H7B H 0.0072 0.3244 0.1485 0.024 Uiso 1 1 calc R . . 
C8 C 0.10472(11) 0.2638(2) 0.21471(5) 0.0195(3) Uani 1 1 d . . . 
C9 C 0.14489(14) 0.1241(2) 0.24681(5) 0.0238(3) Uani 1 1 d . . . 
H9 H 0.1412 0.0020 0.2357 0.029 Uiso 1 1 calc R . . 
C10 C 0.10882(12) 0.4398(2) 0.23249(5) 0.0220(3) Uani 1 1 d . . . 
H10 H 0.0802 0.5368 0.2114 0.026 Uiso 1 1 calc R . . 
C11 C 0.19037(14) 0.1609(2) 0.29491(5) 0.0236(3) Uani 1 1 d . . . 
H11 H 0.2178 0.0639 0.3162 0.028 Uiso 1 1 calc R . . 
C12 C 0.15419(12) 0.4773(2) 0.28085(5) 0.0219(3) Uani 1 1 d . . . 
H12 H 0.1562 0.5989 0.2923 0.026 Uiso 1 1 calc R . . 
C13 C 0.19627(12) 0.3381(2) 0.31222(5) 0.0190(3) Uani 1 1 d . . . 
C14 C 0.24983(13) 0.3695(2) 0.36495(5) 0.0200(3) Uani 1 1 d . . . 
H14A H 0.2144 0.2840 0.3848 0.024 Uiso 1 1 calc R . . 
H14B H 0.3327 0.3399 0.3698 0.024 Uiso 1 1 calc R . . 
C15 C 0.30639(12) 0.6899(2) 0.37703(5) 0.0193(3) Uani 1 1 d . . . 
C16 C 0.44893(18) 0.3548(3) 0.25290(6) 0.0393(4) Uani 1 1 d . . . 
H16A H 0.4176 0.4637 0.2351 0.059 Uiso 1 1 calc R . . 
H16B H 0.3902 0.2594 0.2487 0.059 Uiso 1 1 calc R . . 
H16C H 0.5159 0.3121 0.2405 0.059 Uiso 1 1 calc R . . 
C17 C 0.54859(14) 1.2441(3) 0.50247(6) 0.0315(4) Uani 1 1 d . . . 
H17A H 0.6242 1.2169 0.4951 0.047 Uiso 1 1 calc R . . 
H17B H 0.5184 1.1356 0.5158 0.047 Uiso 1 1 calc R . . 
H17C H 0.5559 1.3430 0.5261 0.047 Uiso 1 1 calc R . . 
H4N H 0.1875(14) 0.567(3) 0.3984(6) 0.027(5) Uiso 1 1 d D . . 
H5NA H 0.4027(16) 0.575(3) 0.3403(7) 0.024(5) Uiso 1 1 d . . . 
H6NA H 0.2440(18) 0.857(3) 0.4145(7) 0.032(5) Uiso 1 1 d . . . 
H5NB H 0.4360(17) 0.765(3) 0.3529(7) 0.033(5) Uiso 1 1 d . . . 
H6NB H 0.3392(19) 0.930(3) 0.3951(8) 0.042(6) Uiso 1 1 d . . . 
H2O H 0.4935(16) 0.302(2) 0.3179(7) 0.027(5) Uiso 1 1 d D . . 
 
loop_ 
 _atom_site_aniso_label 
 _atom_site_aniso_U_11 
 _atom_site_aniso_U_22 
 _atom_site_aniso_U_33 
 _atom_site_aniso_U_23 
 _atom_site_aniso_U_13 
 _atom_site_aniso_U_12 
Cu1 0.01096(8) 0.01297(8) 0.01395(8) -0.00037(6) 0.00086(6) 0.00030(6) 
Cl1 0.01363(14) 0.01736(15) 0.01753(15) 0.00241(12) 0.00308(11) 0.00310(12) 
O1 0.0463(8) 0.0554(9) 0.0282(6) -0.0068(6) 0.0017(6) 0.0184(7) 
N1 0.0139(5) 0.0160(6) 0.0147(5) 0.0019(4) 0.0015(4) 0.0003(4) 
C1 0.0169(6) 0.0193(7) 0.0179(6) -0.0046(5) 0.0024(5) -0.0032(5) 
Cl2 0.01560(15) 0.01428(15) 0.02539(17) 0.00019(13) 0.00349(12) -0.00097(12) 
O2 0.0335(6) 0.0274(6) 0.0252(6) -0.0002(5) 0.0068(5) 0.0015(5) 
N2 0.0149(5) 0.0137(6) 0.0183(6) -0.0019(5) 0.0012(4) 0.0002(4) 
C2 0.0204(7) 0.0129(6) 0.0223(7) -0.0020(5) 0.0033(5) -0.0004(5) 
Cl3 0.02182(17) 0.02425(18) 0.02679(18) -0.00041(15) 0.00518(14) 0.00240(14) 
N3 0.0141(5) 0.0198(6) 0.0134(5) -0.0003(4) 0.0015(4) -0.0010(5) 
C3 0.0163(6) 0.0208(7) 0.0192(7) 0.0008(6) 0.0051(5) -0.0013(6) 
N4 0.0176(6) 0.0300(7) 0.0141(5) -0.0013(5) 0.0054(5) 0.0000(5) 
C4 0.0155(6) 0.0237(7) 0.0187(7) -0.0024(6) 0.0048(5) -0.0005(5) 
N5 0.0231(7) 0.0285(8) 0.0251(7) -0.0051(6) 0.0117(5) -0.0029(6) 
C5 0.0162(6) 0.0193(7) 0.0211(7) 0.0015(6) -0.0016(5) 0.0033(5) 
N6 0.0249(7) 0.0288(8) 0.0231(7) -0.0010(6) 0.0118(6) 0.0006(6) 
C6 0.0179(6) 0.0223(7) 0.0164(6) 0.0049(6) -0.0011(5) 0.0008(6) 
C7 0.0147(6) 0.0314(8) 0.0139(6) -0.0017(6) 0.0017(5) -0.0022(6) 
C8 0.0131(6) 0.0314(8) 0.0139(6) -0.0006(6) 0.0025(5) -0.0018(6) 
C9 0.0289(8) 0.0248(8) 0.0176(7) -0.0015(6) 0.0043(6) -0.0083(6) 
C10 0.0185(7) 0.0321(8) 0.0149(6) 0.0009(6) 0.0020(5) 0.0075(6) 
C11 0.0277(8) 0.0254(8) 0.0168(7) 0.0044(6) 0.0023(6) -0.0045(6) 
C12 0.0211(7) 0.0278(8) 0.0166(6) -0.0021(6) 0.0032(5) 0.0058(6) 
C13 0.0135(6) 0.0301(8) 0.0138(6) 0.0002(6) 0.0035(5) -0.0012(6) 
C14 0.0191(7) 0.0259(8) 0.0143(6) 0.0000(6) 0.0017(5) -0.0004(6) 
C15 0.0174(6) 0.0280(8) 0.0119(6) 0.0019(6) 0.0015(5) 0.0022(6) 
C16 0.0488(11) 0.0445(12) 0.0258(9) -0.0022(8) 0.0106(8) -0.0020(9) 
C17 0.0289(8) 0.0311(9) 0.0340(9) 0.0022(7) 0.0051(7) 0.0012(7) 
 
_geom_special_details 
; 
 All esds (except the esd in the dihedral angle between two l.s. planes) 
 are estimated using the full covariance matrix.  The cell esds are taken 
 into account individually in the estimation of esds in distances, angles 
 and torsion angles; correlations between esds in cell parameters are only 
 used when they are defined by crystal symmetry.  An approximate (isotropic) 
 treatment of cell esds is used for estimating esds involving l.s. planes. 
; 
 
loop_ 
 _geom_bond_atom_site_label_1 
 _geom_bond_atom_site_label_2 
 _geom_bond_distance 
 _geom_bond_site_symmetry_2 
 _geom_bond_publ_flag 
Cu1 N1 2.0124(12) . ? 
Cu1 N2 2.0318(12) . ? 
Cu1 Cl2 2.2741(4) . ? 
Cu1 N3 2.2825(11) . ? 
Cu1 Cl1 2.3199(4) . ? 
O1 C17 1.402(2) . ? 
O1 H1O 0.8400 . ? 
N1 C2 1.4810(18) . ? 
N1 C3 1.4931(18) . ? 
N1 H1 0.831(19) . ? 
C1 N3 1.4757(18) . ? 
C1 C2 1.522(2) . ? 
C1 H1A 0.9900 . ? 
C1 H1B 0.9900 . ? 
O2 C16 1.420(2) . ? 
O2 H2O 0.820(15) . ? 
N2 C4 1.4831(19) . ? 
N2 C5 1.4876(17) . ? 
N2 H2 0.836(18) . ? 
C2 H2A 0.9900 . ? 
C2 H2B 0.9900 . ? 
N3 C6 1.4736(19) . ? 
N3 C7 1.4818(18) . ? 
C3 C4 1.518(2) . ? 
C3 H3A 0.9900 . ? 
C3 H3B 0.9900 . ? 
N4 C15 1.326(2) . ? 
N4 C14 1.447(2) . ? 
N4 H4N 0.826(14) . ? 
C4 H4A 0.9900 . ? 
C4 H4B 0.9900 . ? 
N5 C15 1.3274(19) . ? 
N5 H5NA 0.83(2) . ? 
N5 H5NB 0.86(2) . ? 
C5 C6 1.524(2) . ? 
C5 H5A 0.9900 . ? 
C5 H5B 0.9900 . ? 
N6 C15 1.336(2) . ? 
N6 H6NA 0.83(2) . ? 
N6 H6NB 0.83(2) . ? 
C6 H6A 0.9900 . ? 
C6 H6B 0.9900 . ? 
C7 C8 1.5102(19) . ? 
C7 H7A 0.9900 . ? 
C7 H7B 0.9900 . ? 
C8 C10 1.387(2) . ? 
C8 C9 1.392(2) . ? 
C9 C11 1.389(2) . ? 
C9 H9 0.9500 . ? 
C10 C12 1.396(2) . ? 
C10 H10 0.9500 . ? 
C11 C13 1.390(2) . ? 
C11 H11 0.9500 . ? 
C12 C13 1.383(2) . ? 
C12 H12 0.9500 . ? 
C13 C14 1.5207(19) . ? 
C14 H14A 0.9900 . ? 
C14 H14B 0.9900 . ? 
C16 H16A 0.9800 . ? 
C16 H16B 0.9800 . ? 
C16 H16C 0.9800 . ? 
C17 H17A 0.9800 . ? 
C17 H17B 0.9800 . ? 
C17 H17C 0.9800 . ? 
 
loop_ 
 _geom_angle_atom_site_label_1 
 _geom_angle_atom_site_label_2 
 _geom_angle_atom_site_label_3 
 _geom_angle 
 _geom_angle_site_symmetry_1 
 _geom_angle_site_symmetry_3 
 _geom_angle_publ_flag 
N1 Cu1 N2 83.35(5) . . ? 
N1 Cu1 Cl2 175.29(4) . . ? 
N2 Cu1 Cl2 92.01(4) . . ? 
N1 Cu1 N3 82.48(4) . . ? 
N2 Cu1 N3 82.72(4) . . ? 
Cl2 Cu1 N3 97.76(3) . . ? 
N1 Cu1 Cl1 90.74(4) . . ? 
N2 Cu1 Cl1 168.11(3) . . ? 
Cl2 Cu1 Cl1 93.685(13) . . ? 
N3 Cu1 Cl1 106.80(3) . . ? 
C17 O1 H1O 109.5 . . ? 
C2 N1 C3 113.13(11) . . ? 
C2 N1 Cu1 106.77(9) . . ? 
C3 N1 Cu1 111.99(9) . . ? 
C2 N1 H1 107.5(13) . . ? 
C3 N1 H1 108.9(13) . . ? 
Cu1 N1 H1 108.3(13) . . ? 
N3 C1 C2 111.16(11) . . ? 
N3 C1 H1A 109.4 . . ? 
C2 C1 H1A 109.4 . . ? 
N3 C1 H1B 109.4 . . ? 
C2 C1 H1B 109.4 . . ? 
H1A C1 H1B 108.0 . . ? 
C16 O2 H2O 108.5(14) . . ? 
C4 N2 C5 113.20(11) . . ? 
C4 N2 Cu1 106.29(9) . . ? 
C5 N2 Cu1 112.14(9) . . ? 
C4 N2 H2 109.3(11) . . ? 
C5 N2 H2 110.2(11) . . ? 
Cu1 N2 H2 105.3(12) . . ? 
N1 C2 C1 110.75(12) . . ? 
N1 C2 H2A 109.5 . . ? 
C1 C2 H2A 109.5 . . ? 
N1 C2 H2B 109.5 . . ? 
C1 C2 H2B 109.5 . . ? 
H2A C2 H2B 108.1 . . ? 
C6 N3 C1 113.79(11) . . ? 
C6 N3 C7 113.11(11) . . ? 
C1 N3 C7 113.03(11) . . ? 
C6 N3 Cu1 99.87(8) . . ? 
C1 N3 Cu1 105.04(8) . . ? 
C7 N3 Cu1 110.85(8) . . ? 
N1 C3 C4 110.48(11) . . ? 
N1 C3 H3A 109.6 . . ? 
C4 C3 H3A 109.6 . . ? 
N1 C3 H3B 109.6 . . ? 
C4 C3 H3B 109.6 . . ? 
H3A C3 H3B 108.1 . . ? 
C15 N4 C14 124.73(12) . . ? 
C15 N4 H4N 118.9(14) . . ? 
C14 N4 H4N 116.2(14) . . ? 
N2 C4 C3 109.07(11) . . ? 
N2 C4 H4A 109.9 . . ? 
C3 C4 H4A 109.9 . . ? 
N2 C4 H4B 109.9 . . ? 
C3 C4 H4B 109.9 . . ? 
H4A C4 H4B 108.3 . . ? 
C15 N5 H5NA 120.6(13) . . ? 
C15 N5 H5NB 117.1(13) . . ? 
H5NA N5 H5NB 122.1(19) . . ? 
N2 C5 C6 113.00(11) . . ? 
N2 C5 H5A 109.0 . . ? 
C6 C5 H5A 109.0 . . ? 
N2 C5 H5B 109.0 . . ? 
C6 C5 H5B 109.0 . . ? 
H5A C5 H5B 107.8 . . ? 
C15 N6 H6NA 117.2(14) . . ? 
C15 N6 H6NB 115.9(15) . . ? 
H6NA N6 H6NB 122(2) . . ? 
N3 C6 C5 111.73(11) . . ? 
N3 C6 H6A 109.3 . . ? 
C5 C6 H6A 109.3 . . ? 
N3 C6 H6B 109.3 . . ? 
C5 C6 H6B 109.3 . . ? 
H6A C6 H6B 107.9 . . ? 
N3 C7 C8 115.39(11) . . ? 
N3 C7 H7A 108.4 . . ? 
C8 C7 H7A 108.4 . . ? 
N3 C7 H7B 108.4 . . ? 
C8 C7 H7B 108.4 . . ? 
H7A C7 H7B 107.5 . . ? 
C10 C8 C9 118.00(13) . . ? 
C10 C8 C7 121.16(14) . . ? 
C9 C8 C7 120.84(14) . . ? 
C11 C9 C8 120.86(15) . . ? 
C11 C9 H9 119.6 . . ? 
C8 C9 H9 119.6 . . ? 
C8 C10 C12 121.26(14) . . ? 
C8 C10 H10 119.4 . . ? 
C12 C10 H10 119.4 . . ? 
C9 C11 C13 120.75(14) . . ? 
C9 C11 H11 119.6 . . ? 
C13 C11 H11 119.6 . . ? 
C13 C12 C10 120.31(15) . . ? 
C13 C12 H12 119.8 . . ? 
C10 C12 H12 119.8 . . ? 
C12 C13 C11 118.78(13) . . ? 
C12 C13 C14 123.15(14) . . ? 
C11 C13 C14 118.07(13) . . ? 
N4 C14 C13 115.02(12) . . ? 
N4 C14 H14A 108.5 . . ? 
C13 C14 H14A 108.5 . . ? 
N4 C14 H14B 108.5 . . ? 
C13 C14 H14B 108.5 . . ? 
H14A C14 H14B 107.5 . . ? 
N4 C15 N5 121.87(15) . . ? 
N4 C15 N6 119.52(14) . . ? 
N5 C15 N6 118.58(15) . . ? 
O2 C16 H16A 109.5 . . ? 
O2 C16 H16B 109.5 . . ? 
H16A C16 H16B 109.5 . . ? 
O2 C16 H16C 109.5 . . ? 
H16A C16 H16C 109.5 . . ? 
H16B C16 H16C 109.5 . . ? 
O1 C17 H17A 109.5 . . ? 
O1 C17 H17B 109.5 . . ? 
H17A C17 H17B 109.5 . . ? 
O1 C17 H17C 109.5 . . ? 
H17A C17 H17C 109.5 . . ? 
H17B C17 H17C 109.5 . . ? 
 
loop_ 
 _geom_hbond_atom_site_label_D 
 _geom_hbond_atom_site_label_H 
 _geom_hbond_atom_site_label_A 
 _geom_hbond_distance_DH 
 _geom_hbond_distance_HA 
 _geom_hbond_distance_DA 
 _geom_hbond_angle_DHA 
 _geom_hbond_site_symmetry_A 
N1 H1 Cl1  0.831(19) 2.602(19) 3.3209(13) 145.6(16) 3_565 
N5 H5NB Cl3  0.86(2) 2.40(2) 3.2152(17) 158.1(18) . 
N5 H5NA O2  0.83(2) 2.03(2) 2.8103(19) 156.8(18) . 
N6 H6NB Cl3  0.83(2) 2.48(2) 3.2619(16) 156(2) . 
N6 H6NA Cl1  0.83(2) 2.41(2) 3.2178(15) 167.1(19) 2 
O2 H2O Cl3  0.820(15) 2.304(15) 3.1139(13) 169.3(18) 1_545 
O1 H1O Cl3  0.84 2.30 3.1407(14) 177.3 . 
 
_diffrn_measured_fraction_theta_max    0.996 
_diffrn_reflns_theta_full              30.00 
_diffrn_measured_fraction_theta_full   0.996 
_refine_diff_density_max    0.524 
_refine_diff_density_min   -0.371 
_refine_diff_density_rms    0.060 
#===END
